# Supplementary material for: Facile formation of dendrimer-stabilized gold nanoparticles modified with diatrizoic acid for enhanced computed tomography imaging applications
Source: Royal Society of Chemistry journal article supplement (doi:10.1039/c2nr31687k), 2012-01-01
Supplement: c2nr31687k.pdf [file c2nr31687k.pdf]

## Electronic Supplementary Information

### **Facile formation of dendrimer-stabilized gold nanoparticles modified with diatrizoic acid for enhanced computed tomography imaging applications**

**Chen Peng,<sup>a1</sup> Kangan Li,<sup>b1</sup> Xueyan Cao,<sup>c</sup> Tingting Xiao,<sup>a</sup> Wenxiu Hou,<sup>c</sup> Linfeng Zheng,<sup>b</sup> Rui Guo,<sup>c</sup> Mingwu Shen,<sup>c</sup> Guixiang Zhang<sup>\*b</sup> and Xiangyang Shi <sup>\*acd</sup>**

<sup>a</sup> State Key Laboratory for Modification of Chemical Fibers and Polymer Materials, Donghua University, Shanghai 201620, People's Republic of China

<sup>b</sup> Department of Radiology, Shanghai Jiaotong University Affiliated First People's Hospital, Shanghai Jiaotong University School of Medicine, 100 Haining Road, Shanghai 200080, People's Republic of China

<sup>c</sup> College of Chemistry, Chemical Engineering and Biotechnology, Donghua University, Shanghai 201620, People's Republic of China

<sup>d</sup> CQM-Centro de Química da Madeira, Universidade da Madeira, Campus da Penteada, 9000-390 Funchal, Portugal

---

\* To whom correspondence should be addressed. E-mail: guixiangzhang@sina.com (G. Zhang), and xshi@dhu.edu.cn (X. Shi).

<sup>1</sup>These authors contributed equally to this work.

**Table S1.** Zeta potential values of [(Au<sup>0</sup>)<sub>50</sub>-G5.NH<sub>2</sub>-DTA] DENPs and [(Au<sup>0</sup>)<sub>50</sub>-G5.NHAc-DTA] DSNPs.

| Sample                                                            | Zeta Potential (mV) |
|-------------------------------------------------------------------|---------------------|
| [(Au <sup>0</sup> ) <sub>50</sub> -G5.NH <sub>2</sub> -DTA] DENPs | 14.2±0.6            |
| [(Au <sup>0</sup> ) <sub>50</sub> -G5.NHAc-DTA] DSNPs             | 6.7±0.2             |

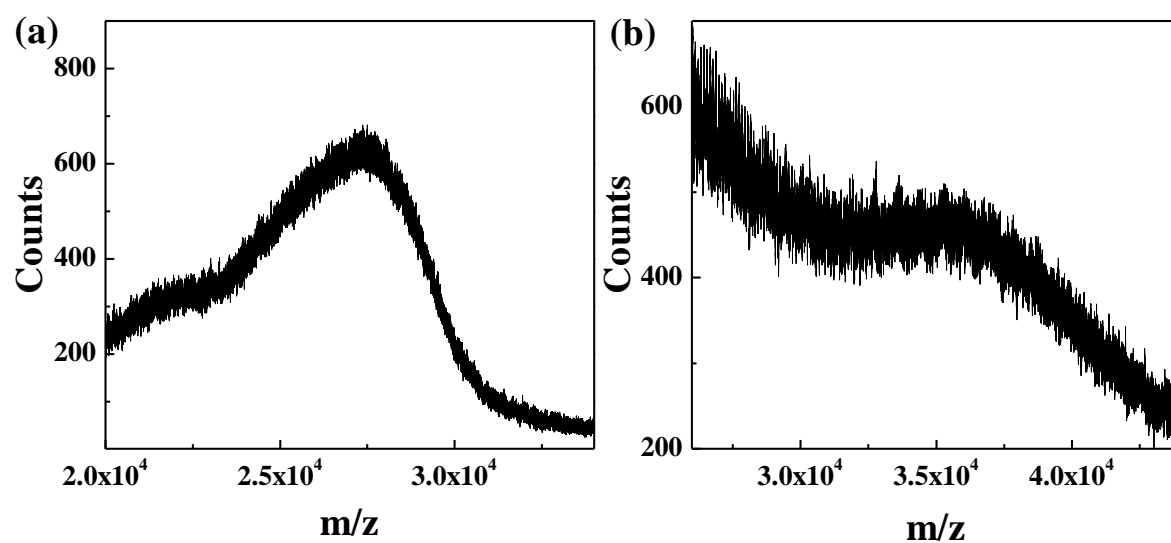

**Figure S1.** MALDI-TOF mass spectra of G5.NH<sub>2</sub> (a) and G5.NH<sub>2</sub>-DTA (b) dendrimers.

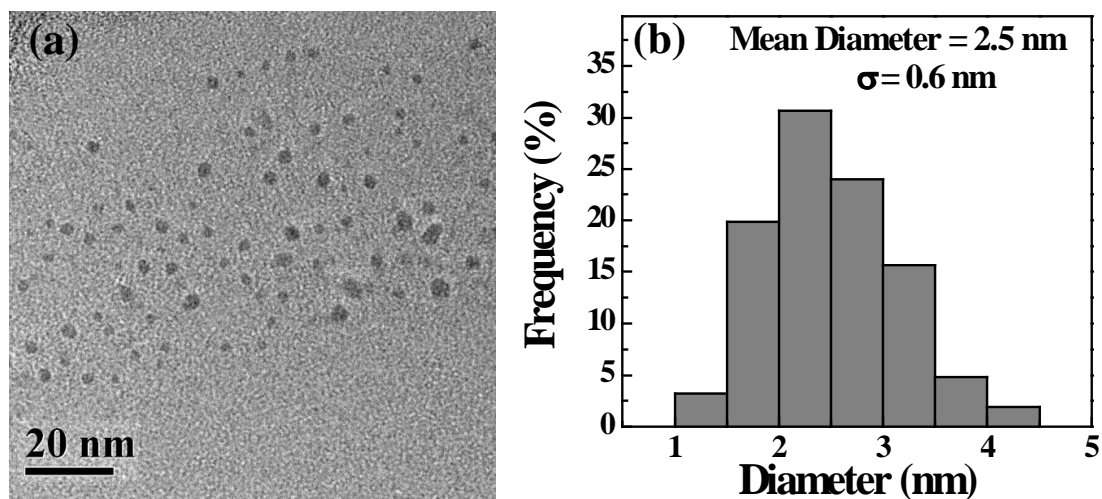

**Figure S2.** TEM image (a) and size distribution histogram (b) of  $[(\text{Au}^0)_{50}\text{-G5.NH}_2\text{-DTA}]$  DENPs.

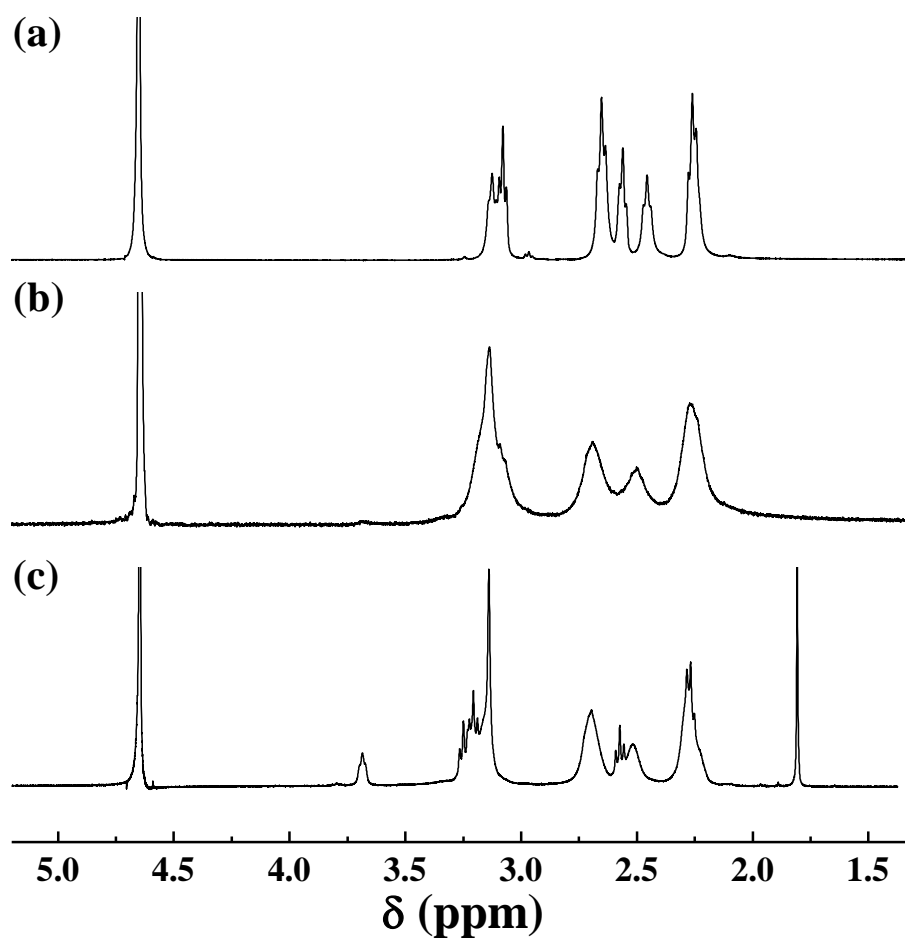

**Figure S3.**  $^1\text{H}$  NMR spectra of G5.NH<sub>2</sub> (a), G5.NH<sub>2</sub>-DTA (b), and  $[(\text{Au}^0)_{50}\text{-G5.NHAc-DTA}]$  DSNPs (c), respectively.

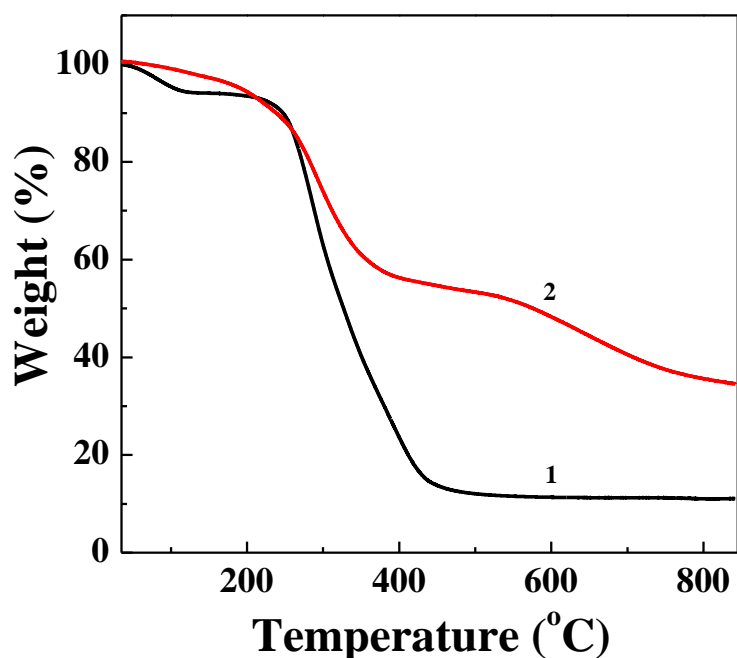

**Figure S4.** TGA curves of G5.NHAc-DTA dendrimers (1) and [(Au<sup>0</sup>)<sub>50</sub>-G5.NHAc-DTA] DSNPs (2).

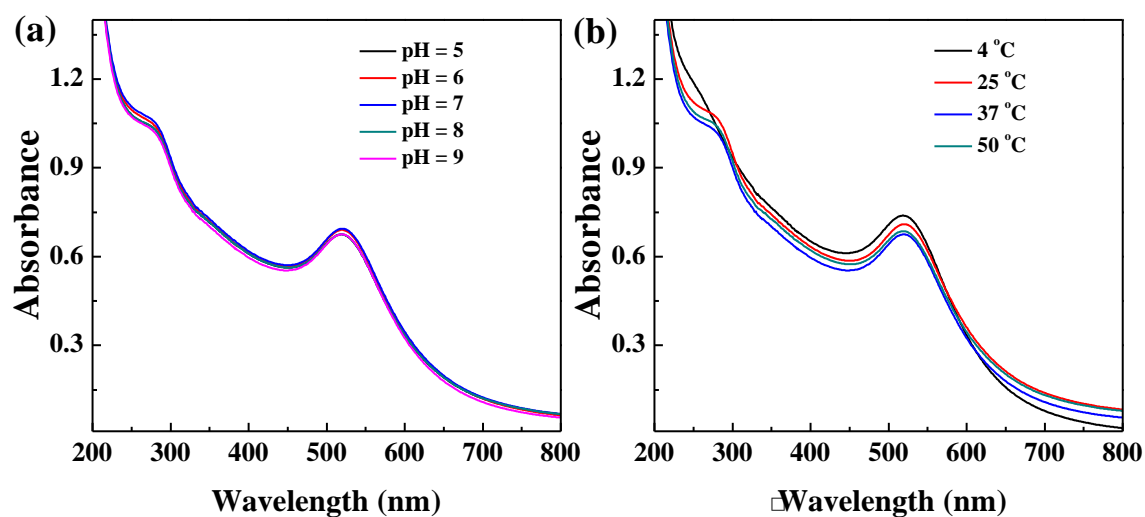

**Figure S5.** UV-vis spectra of [(Au<sup>0</sup>)<sub>50</sub>-G5.NHAc-DTA] DSNPs at different pH conditions in phosphate buffer (0.1 M) at 25 °C (a) and at different temperatures in water solution (pH = 7.0) (b).

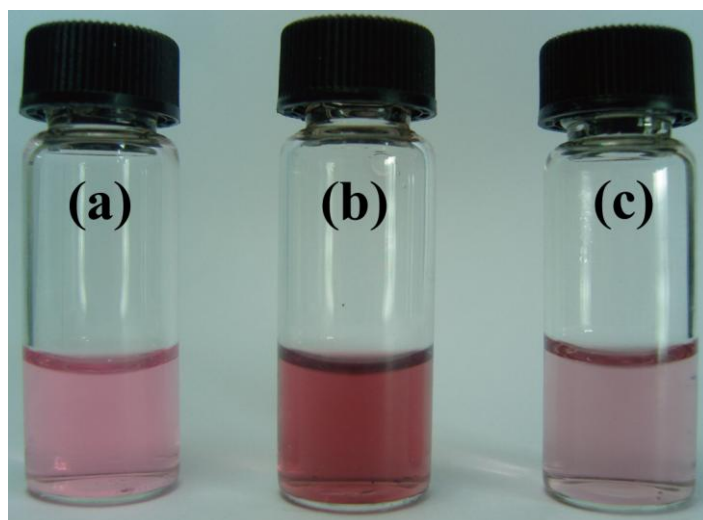

**Figure S6.** Photos of (a) cell culture medium, (b)  $[(\text{Au}^0)_{50}\text{-G5.NHAc-DTA}]$  DSNPs dispersed in cell culture medium, and (c)  $[(\text{Au}^0)_{50}\text{-G5.NHAc-DTA}]$  DSNPs dispersed in PBS solution.

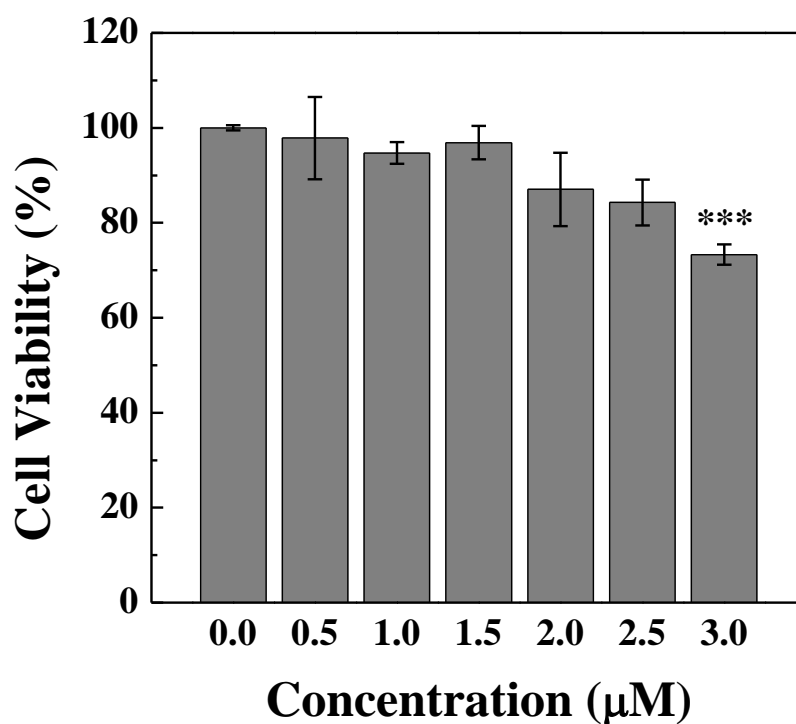

**Figure S7.** MTT assay of the viability of KB cells treated with  $[(\text{Au}^0)_{50}\text{-G5.NHAc-DTA}]$  DSNPs at different concentrations for 12 h (n=4).
